# Supplementary material for: Generation of an hiPSC-Derived Co-Culture System to Assess the Effects of Neuroinflammation on Blood–Brain Barrier Integrity
Source: MDPI journal article supplement (doi:10.3390/cells11030419), 2022-01-26
Supplement: s1 [file s1]

## Supplementary Information

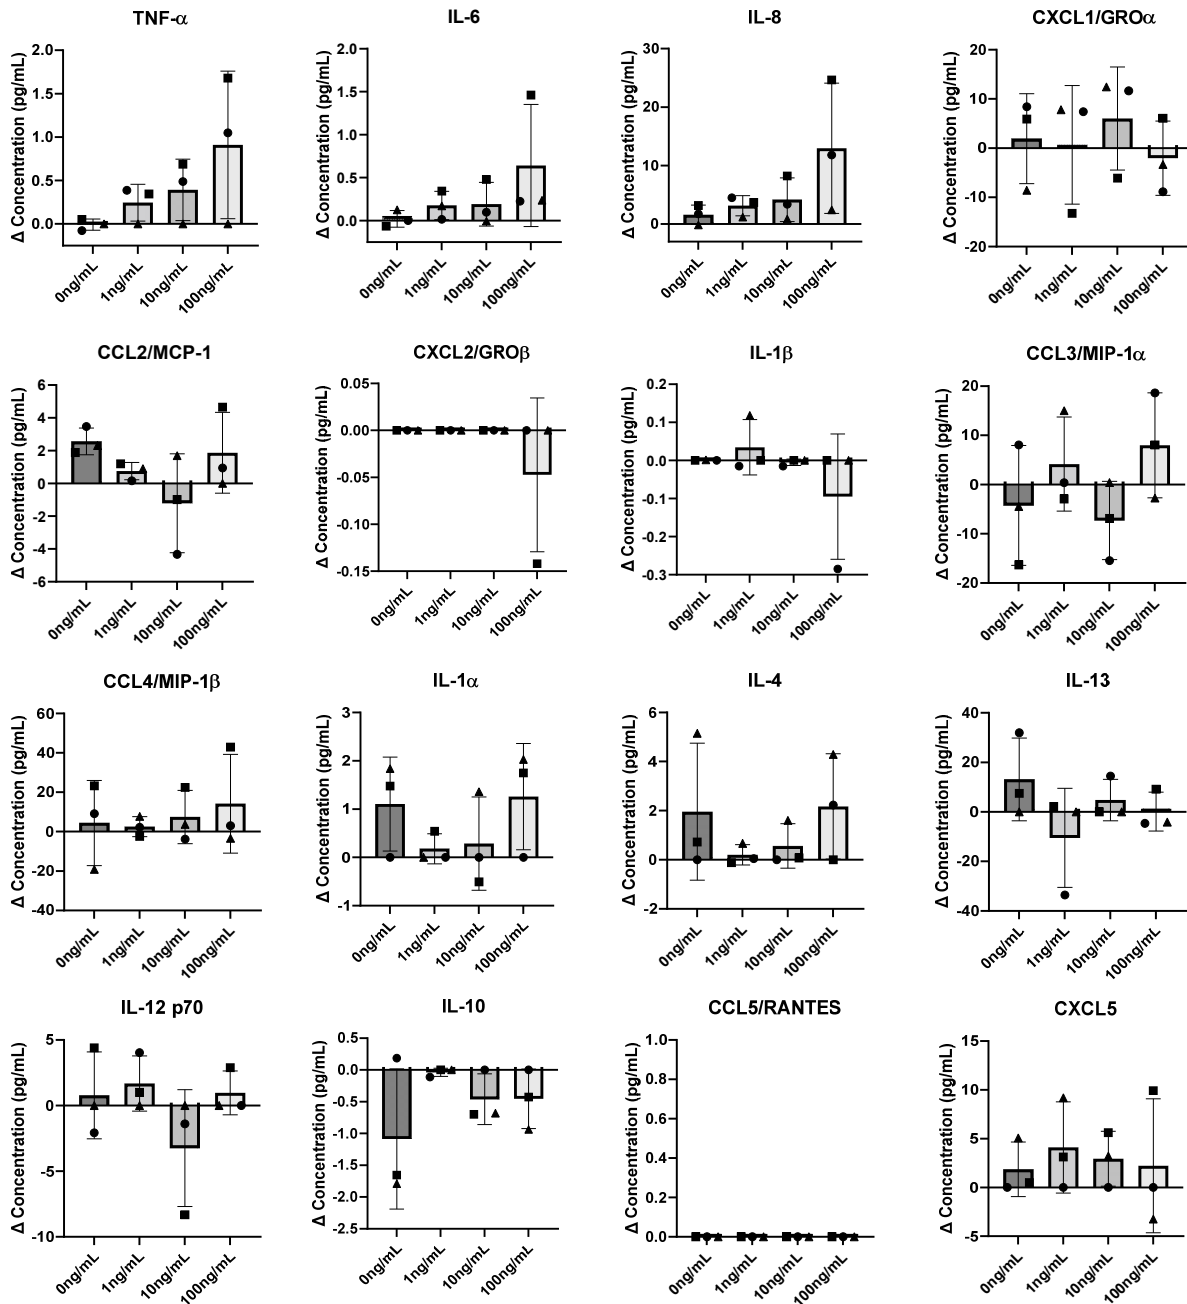

**Figure S1.** hiPSC-derived BMECs exposed to LPS secrete only very low levels of cytokines in comparison to the co-culture system. After 0 h and 9 h of LPS (0, 1, 10, 100 ng/mL) exposure in the BMEC (monoculture) system, cell culture supernatant was removed and cytokine concentration quantified with a Luminex® multiplex assay. Data displays the mean change in cytokine concentrations between 0 h and 9 h of LPS exposure. Each graphical symbol shape (square, triangle and circle) represents each set of biological replicates with at least three technical replicates. Mean values  $\pm$  standard deviation of cytokine concentrations for the 0 h and 9 h timepoints are provided in Table S7.

**Table S1.** Induction Medium Composition

| Reagent                  | Catalogue Number | Manufacture | Final Concentration |
|--------------------------|------------------|-------------|---------------------|
| DMEM/F12                 | 21331020         | Gibco       | -                   |
| KOSR                     | 10828028         | Gibco       | 20%                 |
| MEM NEAA                 | 11140035         | Gibco       | 1X                  |
| GlutaMAX                 | 35050061         | Gibco       | 1 mM                |
| $\beta$ -Mercaptoethanol | 31350010         | Gibco       | 0.1 mM              |
| Penicillin-Streptomycin  | 15140148         | Gibco       | 10 U/mL             |

**Table S2.** Specification Medium Composition

| Reagent                 | Catalogue Number | Manufacture | Final Concentration |
|-------------------------|------------------|-------------|---------------------|
| Human Endothelial SFM   | 11111044         | Gibco       | -                   |
| FBS                     | A3160502         | Gibco       | 1%                  |
| Penicillin-Streptomycin | 15140148         | Gibco       | 10 U/mL             |
| rhFGF                   | 100-18B          | Peptotech   | 20 ng/mL            |
| Retinoic Acid           | R2625            | Sigma       | 10 $\mu$ M          |

**Table S3.** Myeloid Factory Medium Composition

| Reagent                  | Catalogue Number | Manufacture     | Final Concentration |
|--------------------------|------------------|-----------------|---------------------|
| X-VIVO 15                | BE02-060Q        | Lonza           | -                   |
| GlutaMAX                 | 35050061         | Gibco           | 2 mM                |
| Penicillin-Streptomycin  | 15140148         | Gibco           | 10 U/mL             |
| $\beta$ -Mercaptoethanol | 31350010         | Gibco           | 50 $\mu$ M          |
| rhMCSF                   | 130-096-493      | Miltenyi Biotec | 100 ng/mL           |
| rhIL-3                   | 130-093-909      | Miltenyi Biotec | 25 ng/mL            |

**Table S4.** Microglia Medium Composition

| Reagent                 | Catalogue Number | Manufacture     | Final Concentration |
|-------------------------|------------------|-----------------|---------------------|
| RPMI 1640 + Glutamax    | 61870-010        | Gibco           | -                   |
| Penicillin-Streptomycin | 15140148         | Gibco           | 10 U/mL             |
| rhIL-34                 | 130-108-977      | Miltenyi Biotec | 100 ng/mL           |
| rhMCSF                  | 130-096-493      | Miltenyi Biotec | 25 ng/mL            |
| rhTGF- $\beta$ 1        | 130-108-969      | Miltenyi Biotec | 50 ng/mL            |

**Table S5.** Co-Culture Medium Composition

| Reagent                 | Catalogue Number | Manufacture     | Final Concentration |
|-------------------------|------------------|-----------------|---------------------|
| RPMI 1640 + Glutamax    | 61870-010        | Gibco           | -                   |
| Penicillin-Streptomycin | 15140148         | Gibco           | 10 U/mL             |
| rhIL-34                 | 130-108-977      | Miltenyi Biotec | 100 ng/mL           |
| rhMCSF                  | 130-096-493      | Miltenyi Biotec | 25 ng/mL            |

**Table S6.** Cytokine concentrations (pg/mL) at 0 h and 9 h used to calculate the delta mean values provided in Figure 4 (co-culture system exposed to LPS). Each value below represents the mean cytokine concentration from three technical replicates in an experiment (biological replicate). Each row at 0 h and 9 h for each cytokine indicates an experiment with four conditions (thus three cellular experiments were performed) and the supernatants from the same experiment where measured together in the same Luminex® experiment. Thus, each experiment had for each cytokine its own lower limit of detection (LLOD) which was estimated as two standard deviations above background. In case a sample showed for a cytokine a value below the LLOD, this value was replaced by the LLOD in order to still use it for the mean calculation. For each experiment the delta was then calculated between 0 h and 9 h for each cytokine and each condition, respectively.

| Cytokine           | Time | 0 ng/mL LPS | 1 ng/mL LPS | 10 ng/mL LPS | 100 ng/mL LPS |
|--------------------|------|-------------|-------------|--------------|---------------|
| TNF- $\alpha$      | 0h   | 0.03        | 0.03        | 0.05         | 0.06          |
|                    |      | 3.07        | 2.98        | 2.56         | 2.61          |
|                    |      | 7.57        | 5.45        | 5.82         | 5.17          |
|                    | 9h   | 0.02        | 370.34      | 665.60       | 611.29        |
|                    |      | 2.47        | 4084.83     | 4233.21      | 4766.61       |
|                    |      | 5.43        | 1568.78     | 3337.83      | 2891.17       |
| IL-6               | 0h   | 0.27        | 0.23        | 0.49         | 0.49          |
|                    |      | 0.15        | 0.12        | 0.29         | 0.10          |
|                    |      | 1.79        | 1.38        | 2.16         | 1.83          |
|                    | 9h   | 0.21        | 333.78      | 680.30       | 645.04        |
|                    |      | 0.07        | 2815.06     | 3136.78      | 3617.18       |
|                    |      | 1.94        | 1841.22     | 4045.07      | 3443.49       |
| IL-8               | 0h   | 130.83      | 132.35      | 141.48       | 122.94        |
|                    |      | 345.25      | 368.63      | 294.42       | 348.14        |
|                    |      | 346.28      | 310.85      | 329.66       | 283.06        |
|                    | 9h   | 125.22      | 4469.82     | 6024.43      | 5884.17       |
|                    |      | 320.93      | 3901.47     | 3800.18      | 4023.25       |
|                    |      | 346.62      | 15356.50    | 17992.53     | 21626.91      |
| CXCL1/GRO $\alpha$ | 0h   | 18.82       | 2.30        | 16.92        | 14.15         |
|                    |      | 60.30       | 54.00       | 57.88        | 46.59         |
|                    |      | 56.20       | 56.95       | 43.83        | 37.34         |
|                    | 9h   | 15.56       | 1573.70     | 2218.84      | 2268.16       |
|                    |      | 41.74       | 4694.84     | 5116.34      | 5427.13       |
|                    |      | 56.01       | 3398.98     | 4560.51      | 4594.51       |
| CCL2/MCP-1         | 0h   | 221.72      | 207.17      | 234.55       | 215.23        |
|                    |      | 559.22      | 629.80      | 476.81       | 681.59        |
|                    |      | 786.98      | 766.18      | 826.02       | 627.00        |
|                    | 9h   | 235.04      | 863.95      | 886.15       | 706.12        |
|                    |      | 609.51      | 2755.91     | 1680.03      | 1832.65       |
|                    |      | 869.16      | 3900.06     | 4098.99      | 2513.09       |
| CXCL2/GRO $\beta$  | 0h   | 1.00        | 1.00        | 1.00         | 1.00          |
|                    |      | 0.30        | 0.30        | 0.30         | 0.30          |
|                    |      | 1.96        | 3.29        | 1.02         | 2.60          |
|                    | 9h   | 1.00        | 92.49       | 157.75       | 147.17        |
|                    |      | 0.30        | 322.51      | 386.69       | 407.59        |
|                    |      | 1.73        | 213.48      | 254.87       | 249.99        |
| IL-1 $\beta$       | 0h   | 0.09        | 0.03        | 0.07         | 0.03          |
|                    |      | 0.85        | 1.21        | 1.26         | 1.32          |
|                    |      | 1.45        | 1.45        | 1.45         | 1.45          |
|                    | 9h   | 0.03        | 10.38       | 22.90        | 21.67         |

|                     |    |         |          |          |          |
|---------------------|----|---------|----------|----------|----------|
|                     |    | 1.26    | 35.10    | 19.92    | 45.63    |
|                     |    | 1.45    | 5.32     | 23.39    | 49.02    |
| CCL3/MIP-1 $\alpha$ | 0h | 193.89  | 178.65   | 195.86   | 166.60   |
|                     |    | 166.53  | 183.02   | 147.88   | 133.59   |
|                     |    | 626.97  | 532.07   | 485.55   | 391.92   |
|                     | 9h | 137.35  | 6967.63  | 10123.48 | 7943.75  |
|                     |    | 73.29   | 58355.26 | 49841.69 | 58355.26 |
|                     |    | 412.37  | 21921.42 | 22751.58 | 22349.54 |
| CCL4/MIP-1 $\beta$  | 0h | 458.23  | 436.92   | 449.79   | 404.11   |
|                     |    | 1058.54 | 1088.48  | 1080.44  | 970.50   |
|                     |    | 1398.39 | 1282.39  | 1262.04  | 1145.27  |
|                     | 9h | 364.47  | 6777.49  | 8621.71  | 7811.11  |
|                     |    | 729.64  | 27092.99 | 27370.28 | 26175.58 |
|                     |    | 1245.95 | 18118.83 | 21237.78 | 17429.13 |
| IL-1 $\alpha$       | 0h | 3.75    | 2.91     | 2.30     | 4.49     |
|                     |    | 1.60    | 1.60     | 1.60     | 2.13     |
|                     |    | 0.80    | 1.05     | 0.86     | 0.77     |
|                     | 9h | 4.33    | 17.30    | 21.97    | 19.84    |
|                     |    | 1.60    | 37.95    | 26.51    | 37.61    |
|                     |    | 1.80    | 15.46    | 24.09    | 39.00    |
| IL-4                | 0h | 6.79    | 4.01     | 10.07    | 1.47     |
|                     |    | 5.34    | 8.01     | 4.64     | 5.26     |
|                     |    | 12.45   | 8.30     | 4.92     | 5.86     |
|                     | 9h | 0.25    | 40.05    | 48.70    | 48.38    |
|                     |    | 3.00    | 85.52    | 80.39    | 93.42    |
|                     |    | 7.17    | 65.45    | 78.39    | 75.30    |
| IL-13               | 0h | 25.00   | 44.13    | 25.00    | 25.00    |
|                     |    | 140.45  | 129.83   | 114.05   | 130.43   |
|                     |    | 151.56  | 128.72   | 99.18    | 102.06   |
|                     | 9h | 42.06   | 575.64   | 637.81   | 592.81   |
|                     |    | 113.40  | 1086.40  | 1168.52  | 1075.73  |
|                     |    | 134.07  | 759.07   | 1076.68  | 986.68   |
| IL-12 p70           | 0h | 0.80    | 0.80     | 0.80     | 1.32     |
|                     |    | 4.63    | 4.52     | 6.67     | 9.80     |
|                     |    | 3.08    | 4.37     | 6.47     | 0.45     |
|                     | 9h | 0.80    | 53.09    | 61.66    | 46.47    |
|                     |    | 7.26    | 146.43   | 127.43   | 133.11   |
|                     |    | 9.48    | 84.20    | 100.24   | 97.29    |
| IL-10               | 0h | 1.44    | 2.58     | 0.20     | 0.91     |
|                     |    | 2.01    | 2.21     | 0.99     | 0.30     |
|                     |    | 3.16    | 3.48     | 1.57     | 2.84     |
|                     | 9h | 0.31    | 9.36     | 15.43    | 14.76    |
|                     |    | 0.30    | 18.18    | 19.04    | 16.19    |
|                     |    | 0.79    | 23.12    | 27.16    | 22.03    |
| CCL5/RANTES         | 0h | 0.70    | 0.70     | 0.70     | 0.70     |
|                     |    | 1.63    | 1.39     | 2.36     | 1.77     |
|                     |    | 6.11    | 5.09     | 4.83     | 4.27     |
|                     | 9h | 0.70    | 32.17    | 91.76    | 100.84   |
|                     |    | 0.70    | 91.94    | 217.54   | 222.17   |
|                     |    | 6.47    | 107.97   | 229.31   | 198.00   |

|       |    |       |        |        |        |
|-------|----|-------|--------|--------|--------|
| CXCL5 | 0h | 33.90 | 29.55  | 30.32  | 29.73  |
|       |    | 45.47 | 41.41  | 47.12  | 57.94  |
|       |    | 41.91 | 36.28  | 41.74  | 37.38  |
|       | 9h | 20.56 | 253.03 | 283.14 | 301.28 |
|       |    | 36.85 | 261.10 | 295.37 | 347.09 |
|       |    | 47.92 | 269.18 | 305.95 | 342.64 |

**Table S7.** Cytokine concentrations (pg/mL) at 0 h and 9 h used to calculate the delta mean values provided in Figure S1 (BMEC monoculture system exposed to LPS). Each value below represents the mean cytokine concentration from three technical replicates in an experiment (biological replicate). Each row at 0 h and 9 h for each cytokine indicates an experiment with four conditions (thus three cellular experiments were performed) and the supernatants from the same experiment where measured together in the same Luminex® experiment. Thus, each experiment had for each cytokine its own lower limit of detection (LLOD) which was estimated as two standard deviations above background. In case a sample showed for a cytokine a value below the LLOD, this value was replaced by the LLOD in order to still use it for the mean calculation. For each experiment the delta was then calculated between 0 h and 9 h for each cytokine and each condition, respectively.

| Cytokine           | Time | 0 ng/mL LPS | 1 ng/mL LPS | 10 ng/mL LPS | 100 ng/mL LPS |
|--------------------|------|-------------|-------------|--------------|---------------|
| TNF- $\alpha$      | 0h   | 0.55        | 0.51        | 0.59         | 0.42          |
|                    |      | 0.50        | 0.49        | 0.47         | 0.40          |
|                    |      | 0.02        | 0.02        | 0.02         | 0.02          |
|                    | 9h   | 0.60        | 0.85        | 1.28         | 2.11          |
|                    |      | 0.42        | 0.87        | 0.96         | 1.45          |
|                    |      | 0.02        | 0.02        | 0.02         | 0.02          |
| IL-6               | 0h   | 0.73        | 0.57        | 0.72         | 0.60          |
|                    |      | 0.10        | 0.10        | 0.10         | 0.10          |
|                    |      | 0.33        | 0.23        | 0.35         | 0.20          |
|                    | 9h   | 0.67        | 0.91        | 1.20         | 2.07          |
|                    |      | 0.10        | 0.12        | 0.20         | 0.32          |
|                    |      | 0.46        | 0.40        | 0.35         | 0.44          |
| IL-8               | 0h   | 0.34        | 0.34        | 0.51         | 0.58          |
|                    |      | 0.10        | 0.10        | 0.16         | 0.10          |
|                    |      | 0.88        | 0.19        | 0.38         | 0.30          |
|                    | 9h   | 3.51        | 4.05        | 8.75         | 25.22         |
|                    |      | 1.84        | 4.60        | 3.57         | 11.90         |
|                    |      | 0.73        | 1.39        | 1.23         | 2.74          |
| CXCL1/GRO $\alpha$ | 0h   | 22.83       | 37.47       | 23.58        | 19.41         |
|                    |      | 31.71       | 17.34       | 31.53        | 39.20         |
|                    |      | 10.85       | 6.53        | 3.75         | 7.94          |
|                    | 9h   | 28.74       | 24.22       | 17.51        | 25.49         |
|                    |      | 40.12       | 24.74       | 43.18        | 30.34         |
|                    |      | 2.30        | 14.34       | 16.19        | 4.64          |
| CCL2/MCP-1         | 0h   | 6.75        | 7.23        | 8.48         | 5.97          |
|                    |      | 1.91        | 2.69        | 7.95         | 5.63          |
|                    |      | 1.40        | 1.40        | 1.43         | 1.40          |
|                    | 9h   | 8.64        | 8.42        | 7.49         | 10.62         |
|                    |      | 5.38        | 2.86        | 3.62         | 6.58          |
|                    |      | 3.72        | 2.31        | 3.12         | 1.40          |
| CXCL2/GRO $\beta$  | 0h   | 1.02        | 1.02        | 1.02         | 1.17          |
|                    |      | 0.30        | 0.30        | 0.30         | 0.30          |

|                     |    |       |       |       |       |
|---------------------|----|-------|-------|-------|-------|
|                     | 9h | 1.00  | 1.00  | 1.00  | 1.00  |
|                     |    | 1.02  | 1.02  | 1.02  | 1.02  |
|                     |    | 0.30  | 0.30  | 0.30  | 0.30  |
|                     |    | 1.00  | 1.00  | 1.00  | 1.00  |
| IL-1 $\beta$        | 0h | 1.45  | 1.45  | 1.45  | 1.45  |
|                     |    | 0.71  | 0.95  | 0.97  | 0.90  |
|                     |    | 0.03  | 0.03  | 0.03  | 0.03  |
|                     | 9h | 1.45  | 1.45  | 1.45  | 1.45  |
|                     |    | 0.71  | 0.94  | 0.95  | 0.61  |
|                     |    | 0.03  | 0.15  | 0.03  | 0.03  |
| CCL3/MIP-1 $\alpha$ | 0h | 38.14 | 36.87 | 35.82 | 33.34 |
|                     |    | 19.14 | 24.48 | 39.19 | 16.00 |
|                     |    | 78.25 | 62.44 | 78.21 | 71.76 |
|                     | 9h | 21.82 | 33.97 | 28.95 | 41.40 |
|                     |    | 27.17 | 24.85 | 23.74 | 34.61 |
|                     |    | 73.80 | 77.45 | 78.62 | 69.03 |
| CCL4/MIP-1 $\beta$  | 0h | 26.06 | 28.42 | 31.80 | 27.33 |
|                     |    | 29.00 | 29.00 | 32.96 | 42.43 |
|                     |    | 66.16 | 22.50 | 35.69 | 27.86 |
|                     | 9h | 49.39 | 26.00 | 54.24 | 70.27 |
|                     |    | 38.11 | 31.23 | 29.13 | 45.51 |
|                     |    | 47.02 | 30.29 | 39.37 | 24.48 |
| IL-1 $\alpha$       | 0h | 0.21  | 0.16  | 0.76  | 0.47  |
|                     |    | 1.60  | 1.60  | 1.60  | 1.60  |
|                     |    | 2.30  | 2.30  | 2.30  | 2.31  |
|                     | 9h | 1.69  | 0.70  | 0.26  | 2.22  |
|                     |    | 1.60  | 1.60  | 1.60  | 1.60  |
|                     |    | 4.14  | 2.30  | 3.66  | 4.33  |
| IL-4                | 0h | 0.90  | 1.02  | 1.14  | 1.40  |
|                     |    | 3.00  | 3.00  | 3.00  | 4.02  |
|                     |    | 1.28  | 3.26  | 1.56  | 1.28  |
|                     | 9h | 1.62  | 0.91  | 1.22  | 1.40  |
|                     |    | 3.00  | 3.05  | 3.00  | 6.25  |
|                     |    | 6.44  | 3.93  | 3.17  | 5.57  |
| IL-13               | 0h | 13.87 | 10.00 | 10.00 | 10.00 |
|                     |    | 35.70 | 66.08 | 61.54 | 55.52 |
|                     |    | 25.00 | 25.00 | 25.00 | 29.11 |
|                     | 9h | 21.38 | 12.14 | 10.00 | 19.17 |
|                     |    | 57.37 | 32.48 | 76.03 | 50.90 |
|                     |    | 25.00 | 25.00 | 25.00 | 25.00 |
| IL-12 p70           | 0h | 3.22  | 1.22  | 8.77  | 0.77  |
|                     |    | 7.63  | 2.80  | 3.08  | 0.20  |
|                     |    | 0.80  | 0.80  | 0.80  | 0.80  |
|                     | 9h | 7.63  | 2.23  | 0.45  | 3.67  |
|                     |    | 5.56  | 6.83  | 1.68  | 0.20  |
|                     |    | 0.80  | 0.80  | 0.80  | 0.80  |
| IL-10               | 0h | 1.82  | 0.17  | 0.87  | 0.60  |
|                     |    | 1.26  | 0.41  | 0.30  | 0.30  |
|                     |    | 1.99  | 0.20  | 0.88  | 1.14  |
|                     | 9h | 0.17  | 0.17  | 0.17  | 0.17  |

|             |    |       |       |       |       |
|-------------|----|-------|-------|-------|-------|
|             |    | 1.44  | 0.30  | 0.30  | 0.30  |
|             |    | 0.20  | 0.20  | 0.20  | 0.20  |
| CCL5/RANTES | 0h | 3.76  | 3.76  | 3.76  | 3.76  |
|             |    | 0.60  | 0.60  | 0.60  | 0.60  |
|             |    | 0.70  | 0.70  | 0.70  | 0.70  |
|             | 9h | 3.76  | 3.76  | 3.76  | 3.76  |
|             |    | 0.60  | 0.60  | 0.60  | 0.60  |
|             |    | 0.70  | 0.70  | 0.70  | 0.70  |
| CXCL5       | 0h | 0.90  | 0.40  | 1.96  | 1.29  |
|             |    | 19.00 | 19.00 | 19.00 | 19.00 |
|             |    | 1.13  | 1.13  | 4.54  | 10.16 |
|             | 9h | 1.41  | 3.52  | 7.58  | 11.23 |
|             |    | 19.00 | 19.00 | 19.00 | 19.00 |
|             |    | 6.21  | 10.32 | 7.76  | 6.91  |
